# Supplementary material for: Phenotypes of cough in children: a latent class analysis
Source: bioRxiv or medRxiv preprint supplement (doi:10.1101/2023.03.09.23287047), 2023-03-10
Supplement: Supplementary file [file media-1.pdf]

## Online supplements- Appendix S1

### Supplementary methods

#### 2.4 Definition of variables to characterise and validate identified phenotypes

##### *Parent-reported characteristics*

We assessed how the identified phenotypes differed with respect to the following parent-reported information from the baseline questionnaire:

- *sociodemographic characteristics* (sex, age, country of origin, and parental education)
- *environmental exposure* (parental smoking)
- *family history* (asthma or inhaler use, hay fever, and chronic cough)
- *comorbidities in the child's lifetime* (previous wheeze, physician-diagnosed asthma, hay fever, and eczema).

##### *Paediatric pulmonologist diagnoses*

We compared phenotypes with diagnoses given by paediatric pulmonologists who were unaware of the latent class analysis results and grouped them into diagnostic categories. A child could have several diagnoses, such as

- *asthma and asthma-like diagnosis* (chronic asthma, episodic asthma, exercise-induced asthma, wheeze, recurrent bronchitis, bronchial hyperreactivity, exercise-induced wheeze)
- *chronic cough* (recurrent cough of unknown aetiology, increased vulnerability to viral infections, post-infectious cough, psychogenic cough, chronic obstructive rhinopathy)

with posterior rhinorrhea, cough hypersensitivity syndrome, protracted bacterial bronchitis, gastroesophageal reflux disease)

- *exercise-related problems* (dysfunctional breathing, hyperventilation syndrome, stridor, sighing, vocal cord dysfunction, induced laryngeal obstruction, deconditioning)
- *chronic snoring* (adenoid hypertrophy, tonsil hypertrophy, obstructive sleep apnea and unspecific snoring)
- *rhinitis or rhino-conjunctivitis* and *allergic sensitisation/atopy*

## Supplementary Tables and Figures

**Table S1:** Definitions, answer categories, and percentages of missing of the indicator variables used to build the latent class analysis model to identify cough phenotypes among children (study population, n=531)

| Variable                | Question                                                                                                                                                                                                                                   | Answer categories , N(%)                                                                                                                   | Dichotomisation, N(%)                                                        | Missing                                                |
|-------------------------|--------------------------------------------------------------------------------------------------------------------------------------------------------------------------------------------------------------------------------------------|--------------------------------------------------------------------------------------------------------------------------------------------|------------------------------------------------------------------------------|--------------------------------------------------------|
| Number of colds         | How many colds did your child have in the past 12 months?[1]                                                                                                                                                                               | (i) None, 9 (2)<br>(ii) 1-3, 298 (56)<br>(iii) 4-6, 146 (28)<br>(iv) 7-9, 50 (9)<br>(v) $\geq 10$ , 11 (2)<br>(vi) Missing, 17 (3)         | (i) 0-6, 470 (89)<br>(ii) $\geq 7$ , 61 (11)                                 | Missing recoded using the median number of colds (1–3) |
| Pneumonia               | Did your child have a pneumonia in the last 12 months?[2]                                                                                                                                                                                  | (i)None, 495 (93)<br>(ii) Yes, once, 27 (5)<br>(iii) Yes, several times, 4 (1)<br>(iv) Missing, 5 (1)                                      | (i)No, 500 (94)<br>(ii)Yes, 31 (6)                                           | Missing recoded as “no”                                |
| Otitis media            | Did your child have a middle ear infection in the past 12 months?[2]                                                                                                                                                                       | (i)None, 472 (89)<br>(ii) Yes, once, 33 (6)<br>(iii) Yes, several times, 14 (3)<br>(iv) Missing, 12 (2)                                    | (i)No, 484 (91)<br>(ii)Yes, 47 (9)                                           | Missing recoded as “no”                                |
| Snoring                 | During the past 12 months, has your child sometimes snored?[1]                                                                                                                                                                             | (i)No, 174 (33)<br>(ii)Only with colds, 159 (30)<br>(iii)Also without colds, 144 (27)<br>(iv) Almost always, 42 (8)<br>(v) Missing, 12 (2) | (i)No/only with colds, 345 (65)<br>(ii)Without colds/almost always, 186 (35) | Missing recoded as “no”                                |
| Rhino conjunctivitis    | In the past 12 months, has your child had a problem with sneezing, or a runny, or blocked nose when he/she did not have a cold or the flu? If yes, in the past 12 months, has this nose problem been accompanied by itchy-watery eyes? [3] | (i)No, 301 (57)<br>(ii)Yes, 195 (37)<br>(iii) Missing, 35 (7)                                                                              | (i)No, 336 (63)<br>(ii)Yes, 195 (37)                                         | Missing recoded as “no”                                |
| Allergic cough triggers | Which of the following situation has caused your child to experience coughing or wheezing in the last 12 months?[1]                                                                                                                        |                                                                                                                                            |                                                                              |                                                        |
|                         | Pollen                                                                                                                                                                                                                                     | (i)Never, 204 (38)<br>(ii)Sometimes, 149 (28)<br>(iii)Often, 101 (19)<br>(iv)Missing, 77 (15)                                              | (i)No, 281 (53)<br>(ii)Yes, 250 (47)                                         | Missing recoded as “no”                                |
|                         | Animal                                                                                                                                                                                                                                     | (i)Never, 327 (62)<br>(ii)Sometimes, 79 (15)<br>(iii)Often, 36 (7)<br>(iv)Missing, 89 (17)                                                 | (i)No, 416 (78)<br>(ii)Yes, 115 (22)                                         | Missing recoded as “no”                                |
|                         | House dust                                                                                                                                                                                                                                 | (i)Never, 265 (50)<br>(ii)Sometimes, 118 (22)<br>(iii)Often, 49 (9)<br>(iv)Missing, 99 (19)                                                | (i)No, 364 (69)<br>(ii)Yes, 167 (31)                                         | Missing recoded as “no”                                |
|                         | Number of allergic cough triggers                                                                                                                                                                                                          | (i)0, 213(49)<br>(ii)1, 158 (30)<br>(iii)2, 106 (20)<br>(iv)3, 54 (10)                                                                     | Use as ‘count’ variable                                                      |                                                        |
| Night cough             | In the last 12 months has your child had a dry cough at                                                                                                                                                                                    | (i)No, 246 (46)<br>(ii)Yes, 276 (52)                                                                                                       | (i)No, 255(48)<br>(ii)Yes, 276 (52)                                          | Missing recoded as “no”                                |

|                  |                                                                                              |                                                                                                     |                                                                             |                         |
|------------------|----------------------------------------------------------------------------------------------|-----------------------------------------------------------------------------------------------------|-----------------------------------------------------------------------------|-------------------------|
|                  | night, apart from a cough associated with a cold or a chest infection [3]                    | (iii) Missing, 9 (2)                                                                                |                                                                             |                         |
| Type of cough    | Most of the time, is your child's cough rather dry or wet?[1]                                | (i) Mostly dry, 253 (48)<br>(ii) Mostly wet, 53 (10)<br>(iii) Both, 221 (42)<br>(vi) Missing, 4 (1) | (i) Mostly dry → 253 (48)<br>(ii) Most wet/both → 274(52)<br>Missing: 4 (1) |                         |
| Cough > 2 months | Has your child had a cough in the past 12 months that lasted more than 2 months in a row?[1] | (i) No, 434 (82)<br>(ii) Yes, 79 (15)<br>(iii) Missing, 18 (3)                                      | (i) No → 452 (85)<br>(ii) Yes → 79 (15)                                     | Missing recoded as "no" |

**Table S2:** Frequency of diagnostic tests done and follow-up questionnaires completed, in total, and based on the 4 classes

| Class                                        |          | 1                    | 2                                                               | 3                                     | 4              |         |
|----------------------------------------------|----------|----------------------|-----------------------------------------------------------------|---------------------------------------|----------------|---------|
| Class description                            | All      | Unspecific dry cough | Non-allergic infectious and night cough with snoring and otitis | Allergic dry night cough with snoring | Allergic cough |         |
|                                              | (N=531)  | (N=145)              | (N=18)                                                          | (N=45)                                | (N=323)        |         |
|                                              | N (%)    | N (%)                | N (%)                                                           | N (%)                                 | N (%)          | p-value |
| Spirometry parameters                        |          |                      |                                                                 |                                       |                |         |
| FEV1                                         | 451 (85) | 125 (86)             | 16 (89)                                                         | 41 (91)                               | 269 (83)       | 0.487   |
| FVC                                          | 440 (83) | 125 (86)             | 16 (89)                                                         | 38 (84)                               | 261 (81)       | 0.450   |
| FEV1/FVC                                     | 436 (82) | 122 (84)             | 16 (89)                                                         | 38 (84)                               | 260 (81)       | 0.635   |
| FEF 25–75                                    | 316 (60) | 94 (65)              | 11 (61)                                                         | 25 (56)                               | 186 (58)       | 0.474   |
| Bronchodilator response test                 | 239 (45) | 73 (50)              | 10 (56)                                                         | 14 (31)                               | 142 (44)       | 0.105   |
| FeNO                                         |          |                      |                                                                 |                                       |                |         |
| Online and offline                           | 479 (90) | 126 (87)             | 15 (83)                                                         | 42 (93)                               | 296 (92)       | 0.220*  |
| Online only                                  | 450 (85) | 116 (80)             | 13 (72)                                                         | 37 (82)                               | 284 (88)       | 0.059   |
| Allergy tests                                | 353 (66) | 93 (64)              | 13 (72)                                                         | 32 (71)                               | 215 (67)       | 0.787   |
| Completed first year follow-up questionnaire | 360 (68) | 101 (70)             | 14 (78)                                                         | 29 (64)                               | 216 (67)       | 0.704   |

FEV1: forced expiratory volume in 1 second; FVC: forced vital capacity, FEF 25–75: forced expiratory flow at 25–75% of the vital capacity; FeNO: fractional exhaled nitric oxide; *p*-values calculated using Chi-square tests, \**p*-value calculated using Fisher's exact test

**Figure S1:** Flowchart of included participants

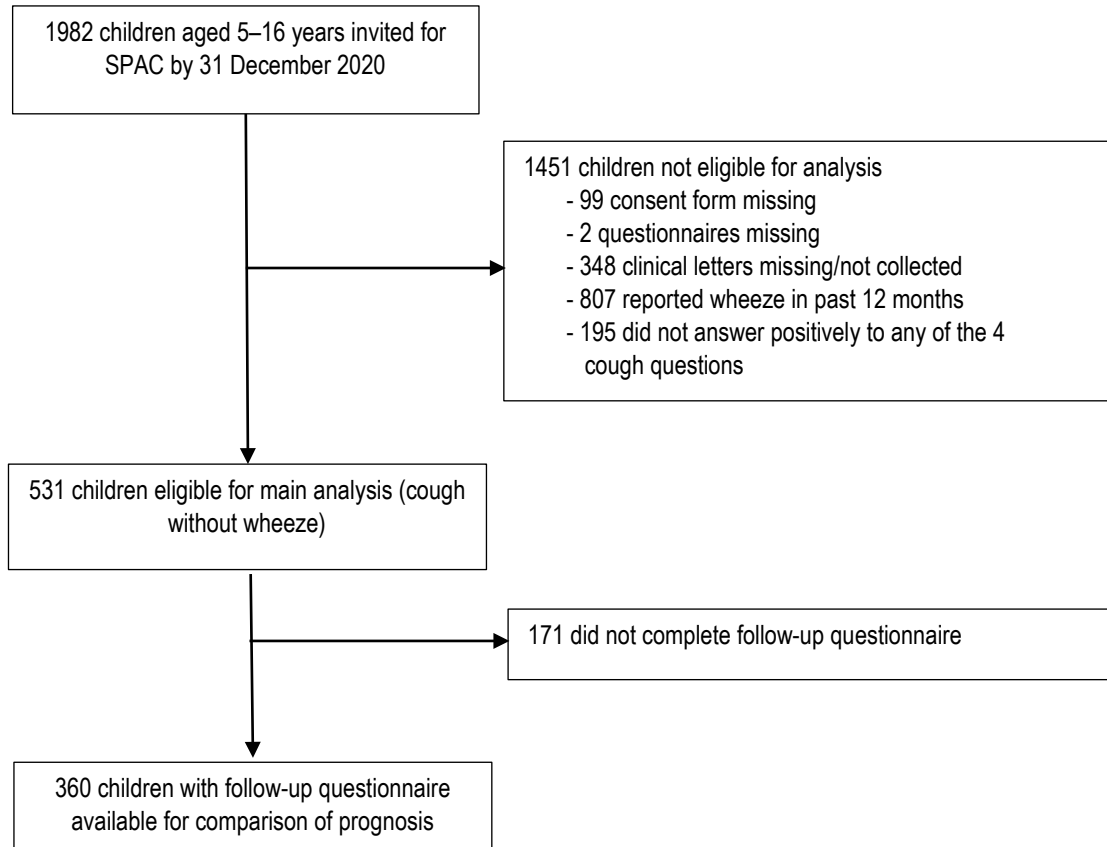

**Table S3:** Statistical fit indices of the different latent class models of cough phenotypes (N=531)

| Models     | Log-likelihood | AIC             | BIC             |
|------------|----------------|-----------------|-----------------|
| 2 classes  | -2780.6        | 5599.2          | <b>5680.421</b> |
| 3 classes  | -2761.263      | 5580.526        | 5704.494        |
| 4 classes  | -2741.936      | <b>5561.873</b> | 5728.589        |
| 5 classes  | -2732.687      | 5563.373        | 5772.836        |
| 6 classes  | -2725.704      | 5569.408        | 5821.619        |
| 7 classes  | -2719.277      | 5566.555        | 5840.139        |
| 8 classes  | -2717.439      | 5592.878        | 5930.584        |
| 9 classes  | -2707.123      | 5590.247        | 5966.426        |
| 10 classes | -2701.068      | 5598.136        | 6017.062        |

AIC: Akaike information criterion; BIC: Bayesian information criterion; the lowest values of AIC and BIC represents the best fitting models; Values in **bold** are the lowest values for AIC and BIC

**Table S4:** Estimated class sizes and estimated probabilities of cough-related symptoms and characteristics of the 4-class models identified by latent class analysis based on the lowest Akaike Information Criterion (N=531)

|                                               | Class 1 | Class 2 | Class 3 | Class 4 |
|-----------------------------------------------|---------|---------|---------|---------|
| <b>Latent class probabilities</b>             | 0.25    | 0.04    | 0.09    | 0.61    |
| <b>Item response probabilities</b>            |         |         |         |         |
| Frequent colds $\geq 7$ /year                 | 0.15    | 0.29    | 0.18    | 0.08    |
| Pneumonia                                     | 0.06    | 0.21    | 0.19    | 0.03    |
| Otitis media                                  | 0.02    | 0.79    | 0.00    | 0.09    |
| Snoring (also without cold and almost always) | 0.18    | 0.84    | 0.68    | 0.34    |
| Rhino-conjunctivitis                          | 0.01    | 0.00    | 0.39    | 0.54    |
| Number of allergic triggers <sup>#</sup>      | 0.18    | 0.38    | 1.34    | 1.33    |
| Night cough                                   | 0.33    | 0.91    | 1.00    | 0.50    |
| Mostly dry cough                              | 0.51    | 0.26    | 0.71    | 0.45    |
| Cough > 2 months                              | 0.13    | 0.18    | 0.72    | 0.07    |

Width of the column represents relative sizes of classes. All the symptoms are parent-reported and are from the last 12 months; # represents estimated mean number of triggers (range 0–3) and calculated using Poisson. In **bold** are features that differ between classes.

**Legend: range of estimated class size and item response probabilities**

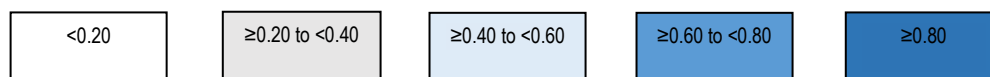

**Legend: range of estimated mean number of allergic triggers**

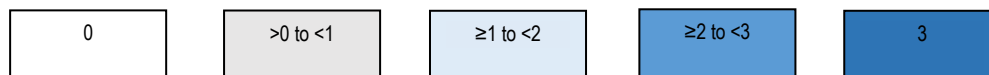

**Class 1:** Unspecific dry cough

**Class 2:** Non-allergic infectious and night cough with snoring and otitis

**Class 3:** Allergic dry night cough with snoring

**Class 4:** Allergic cough



**Table S5:** Estimated class sizes and estimated probabilities of cough-related symptoms and characteristics and estimated class sizes of the two-class model identified by latent class analysis based on the lowest Bayesian Information Criterion (N=531)

|                                                       | Latent class |         |
|-------------------------------------------------------|--------------|---------|
|                                                       | Class 1      | Class 2 |
| <b><i>Latent class probabilities</i></b>              | 0.73         | 0.27    |
| <b><i>Item response probabilities</i></b>             |              |         |
| Frequent colds $\geq 7$ /year                         | 0.09         | 0.17    |
| Pneumonia                                             | 0.05         | 0.08    |
| Otitis media                                          | 0.09         | 0.07    |
| Snoring (also without cold and almost always)         | 0.39         | 0.24    |
| Rhinoconjunctivitis                                   | 0.51         | 0.01    |
| Number of allergic triggers <sup>#</sup> (mean count) | 1.32         | 0.17    |
| Night cough                                           | 0.57         | 0.39    |
| Mostly dry cough                                      | 0.48         | 0.49    |
| Cough > 2 months                                      | 0.15         | 0.15    |

All the symptoms are parent-reported and are from the last 12 months; # represents mean number of triggers (range 0–3) and calculated using Poisson

**Figure S2:** Distribution of spirometry parameters z-scores (FEV1, FVC, FEV1/FVC and FEF 25-75) based on the 4 identified cough phenotypes

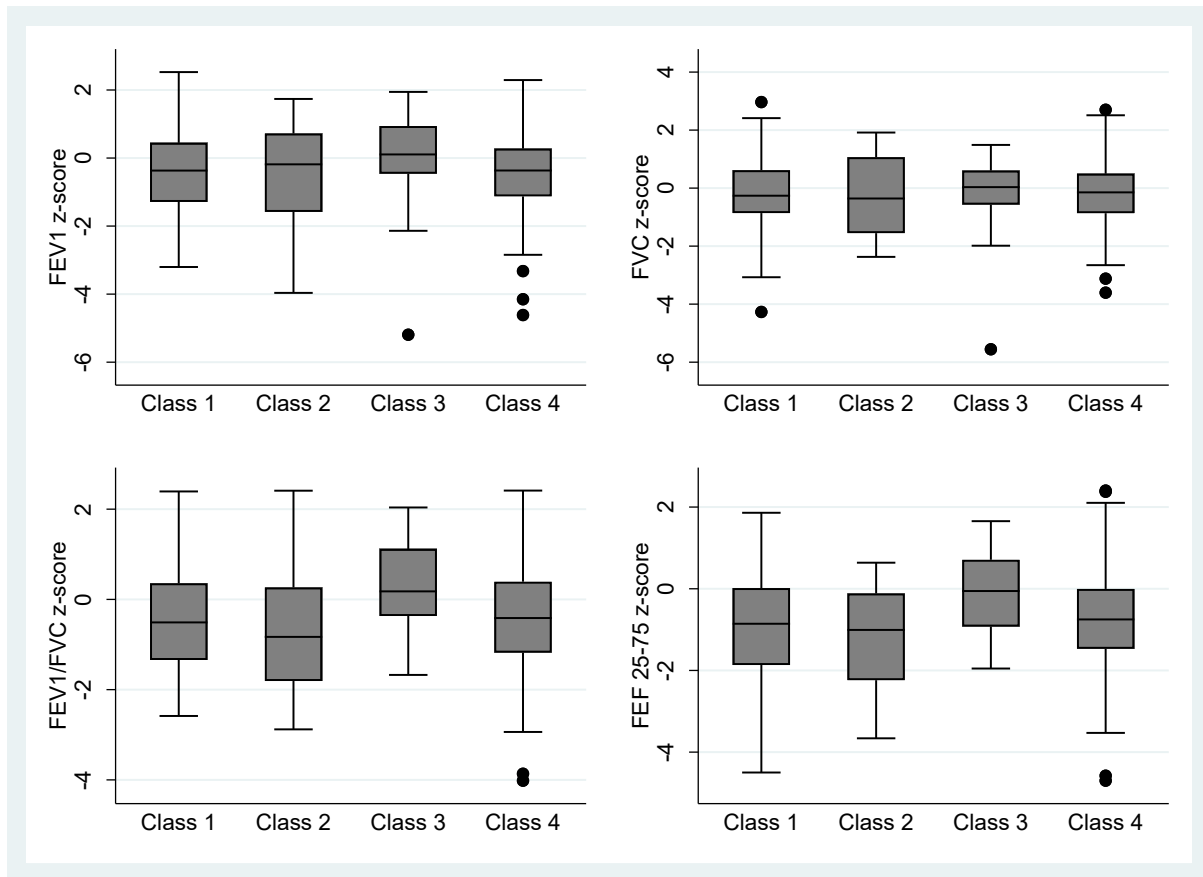

FEV1: forced expiratory volume in 1 second; FVC: forced vital capacity, FEF 25–75: forced expiratory flow at 25–75% of the vital capacity

**Class 1:** Unspecific dry cough

**Class 2:** Non-allergic infectious and night cough associated with snoring and otitis

**Class 3:** Allergic dry night cough associated with snoring and allergies

**Class 4:** Allergic cough

**Table S6:** Summary of studies looking at cough phenotypes or trajectories using a clustering approach

| Study and year of publication | Study design and population                                                                                                                | Inclusion criteria                                                                                                                                                                                 | Clustering method used and indicator variables                                                                                                                                                                                                                                                                                                                                                                      | Phenotypes/trajectories identified                                                                                                                                                                                                                      | Variable used for characterisation/validation of phenotypes                                                                                                                                                                                                   | External validation                                               |
|-------------------------------|--------------------------------------------------------------------------------------------------------------------------------------------|----------------------------------------------------------------------------------------------------------------------------------------------------------------------------------------------------|---------------------------------------------------------------------------------------------------------------------------------------------------------------------------------------------------------------------------------------------------------------------------------------------------------------------------------------------------------------------------------------------------------------------|---------------------------------------------------------------------------------------------------------------------------------------------------------------------------------------------------------------------------------------------------------|---------------------------------------------------------------------------------------------------------------------------------------------------------------------------------------------------------------------------------------------------------------|-------------------------------------------------------------------|
| Spycher et al., 2008 [4]      | Population-based longitudinal study in UK<br><br>Preschool children<br><br>First survey in 1990 and second survey in 1992–1994             | Positive answer to attacks of wheezing ever and/or usually have a cough apart from colds in one or both surveys.<br><br>A control group (i.e. asymptomatic children in both surveys) was included. | Clustering method: Latent class analysis (LCA)<br><br>Indicator variables:<br>-Wheeze ever<br>-Attacks in last 12 months<br>-Attacks with shortness of breath<br>-Triggers of wheeze<br>-Season with most frequent attacks<br>-Time of day with worse attacks<br>-Wakened by cough at night<br>-Cough only with colds/apart from colds<br>-Sex<br>-Age<br>-Skin prick tests<br>-FEV0.5<br>-Bronchial responsiveness | 5 phenotypes:<br>(i)Persistent cough<br>(ii)Transient cough<br>(iii)Atopic persistent wheeze<br>(iv)Nonatopic persistent wheeze<br>(v)Transient viral wheeze                                                                                            | Prognosis after 5 and 10 years (wheeze, frequent wheeze, bronchodilator use and cough without colds)                                                                                                                                                          | Validation in an external independent population-based cohort [5] |
| Weinmayr et al., 2013[6]      | Cross-sectional international study on allergies and asthma in childhood (ISAAC)-Phase 2<br><br>School children aged 8–12 years from Spain | Children with a complete set of parental responses on respiratory symptoms.                                                                                                                        | Clustering method: LCA<br><br>Indicator variables:<br>-Wheeze past year<br>-Wheeze if exercise<br>-Wheeze if no exercise<br>-Wheeze with a cold<br>-Wheeze if no cold<br>-Dry cough at night<br>-Coughed up phlegm with colds<br>-Coughed up phlegm without colds<br>-Coughed up phlegm frequently<br>-Ever woken with shortness of breath<br>-Ever woken with tightness of the chest                               | 6 phenotypes:<br>(i)No respiratory symptoms<br>(ii)Cough during colds<br>(iii)Chronic cough and phlegm<br>(iv)Nocturnal breathlessness<br>(v)Wheeze only with colds<br>(vi)Wheeze without colds, with cough<br>(vii)Wheeze without colds, without cough | -Allergic sensitization (skin prick tests and IgE)<br>-Lung function (spirometry)<br>-Bronchial hyperresponsiveness<br>-Demographic characteristics<br>-Clinical symptoms of rhinitis<br>-Examined eczema<br>-Parental history of asthma<br>-Disease severity | No                                                                |

|                                   |                                                                                                                                                                             |                                                                                |                                                                                                                                                                                                                                                                                                       |                                                                                                                                                                                              |                                                                                                                                                                                                                                                                                                   |    |
|-----------------------------------|-----------------------------------------------------------------------------------------------------------------------------------------------------------------------------|--------------------------------------------------------------------------------|-------------------------------------------------------------------------------------------------------------------------------------------------------------------------------------------------------------------------------------------------------------------------------------------------------|----------------------------------------------------------------------------------------------------------------------------------------------------------------------------------------------|---------------------------------------------------------------------------------------------------------------------------------------------------------------------------------------------------------------------------------------------------------------------------------------------------|----|
| Divaret-Chauveau et al., 2022 [7] | European prospective birth cohort (pregnant women recruited in third trimester of pregnancy)<br><br>Parental questionnaires completed at 1, 1.5, 2, 3, 4, 5, 6 and 10 years | Children enrolled in the birth cohort and with at least 6 visits               | Clustering method: LCA<br><br>Indicator variables (occurrence at 1, 1.5, 2, 3, 4, 5, 6 and 10 years old):<br><br>-Cough without a cold<br>-Cough at night without a cold<br>-Cough attack without a cold caused by one of the following factors: physical exercise, excitation, change of temperature | 9 trajectories of cough without cold<br>(i)Never/infrequent cough<br>(ii) 5 acute transient cough<br>(iii)Moderate transient cough<br>(iv)Late persistent cough<br>(v)Early persistent cough | -Characteristics of study population (growing up on a farm, parental history of atopy, gender)<br>-Atopic diseases and sensitization (unremitting wheeze, physician-diagnosed asthma, allergic rhinitis, atopic dermatitis, food allergy, sensitization to perennial, seasonal or food allergens) | No |
| Rancière et al., 2013 [8]         | Birth cohort of full-term, healthy infants from 5 maternity hospitals in PARIS<br><br>Children from birth to age 4 years                                                    | All children with a complete report of dry night cough at 1, 2, 3 and 4 years) | Clustering method: k-means clustering<br><br>Indicator variables (occurrence at 1, 2, 3 and 4 years)<br>-Dry night cough                                                                                                                                                                              | 3 trajectories of dry night cough<br>(i)Never/infrequent pattern<br>(ii)Transient pattern<br>(iii)Rising pattern (including persistent and late coughers)                                    | -Blood markers of atopy (total IgE, eosinophilia, sensitisation to allergens)<br>-reported allergic symptoms (wheezing, rhinoconjunctivitis like symptoms, atopic dermatitis-like symptoms)<br>-reported physician-diagnosed diseases (asthma, eczema, hay fever, or food allergy)                | No |

## References

1. Mozun R, Kuehni CE, Pedersen ESL, Goutaki M, Kurz JM, de Hoogh K, et al. LuftiBus in the school (LUIS): a population-based study on respiratory health in schoolchildren. *Swiss Med Wkly*. 2021;151:w20544.
2. Kuehni CE, Brooke AM, Strippoli MP, Spycher BD, Davis A, Silverman M. Cohort profile: the Leicester respiratory cohorts. *Int J Epidemiol*. 2007;36(5):977-85.
3. Asher MI, Keil U, Anderson HR, Beasley R, Crane J, Martinez F, et al. International Study of Asthma and Allergies in Childhood (ISAAC): rationale and methods. *Eur Respir J*. 1995;8(3):483-91.
4. Spycher BD, Silverman M, Brooke AM, Minder CE, Kuehni CE. Distinguishing phenotypes of childhood wheeze and cough using latent class analysis. *Eur Respir J*. 2008;31(5):974-81.
5. Spycher BD, Silverman M, Pescatore AM, Beardsmore CS, Kuehni CE. Comparison of phenotypes of childhood wheeze and cough in 2 independent cohorts. *J Allergy Clin Immunol*. 2013;132(5):1058-67.
6. Weinmayr G, Keller F, Kleiner A, du Prel JB, Garcia-Marcos L, Batllés-Garrido J, et al. Asthma phenotypes identified by latent class analysis in the ISAAC phase II Spain study. *Clin Exp Allergy*. 2013;43(2):223-32.
7. Divaret-Chauveau A, Mauny F, Hose A, Depner M, Dalphin ML, Kaulek V, et al. Trajectories of cough without a cold in early childhood and associations with atopic diseases. *Clin Exp Allergy*. 2022.
8. Rancière F, Nikasinovic L, Momas I. Dry night cough as a marker of allergy in preschool children: the PARIS birth cohort. *Pediatr Allergy Immunol*. 2013;24(2):131-7.
